# Supplementary material
Source: publisher figshare collection journal article supplement (https://asha.figshare.com/ndownloader/files/38206893)
Supplement: Supplementary file 1 [file 38206893]

# ASK YOUR SLP FOR HELP IN BULLYING PREVENTION

We can assist with:

Classroom education  
on ability awareness

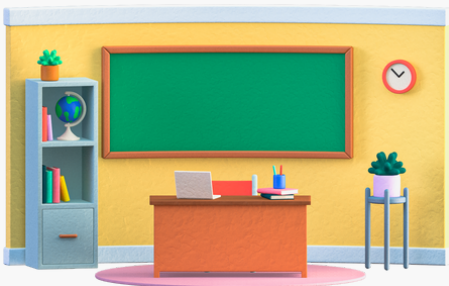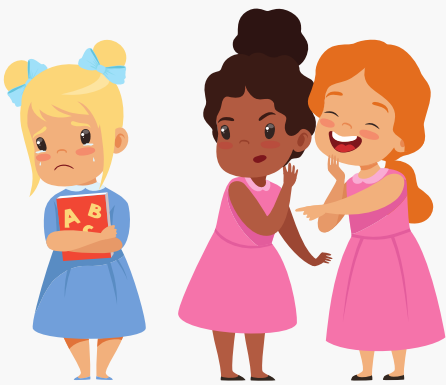

ID students most  
likely to be a target of  
bullying

Facilitate positive peer  
relationships among  
students

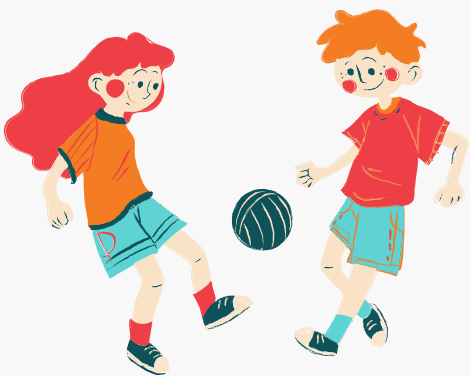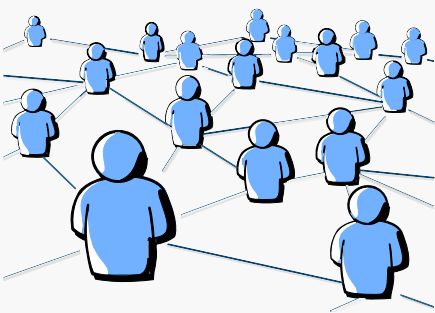

ID social pragmatic  
differences/misunderstandings

Provide services for language  
and social concerns

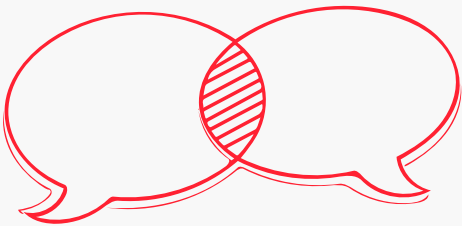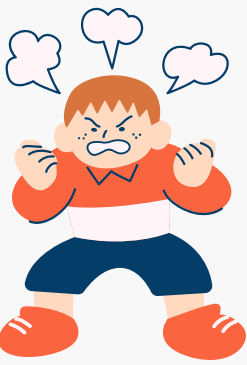

Assistance with communication  
during challenging behavior

Set up ability to have a safe  
and effective reporting  
system based on abilities

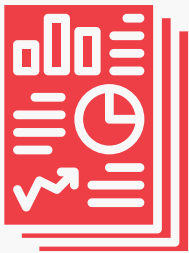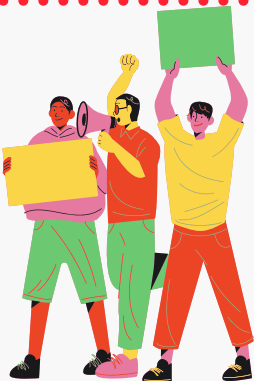

Support/teach self-advocacy
